# Supplementary material for: International biennale of graphic design Brono 1990-1996 & czech graphic design
Source: Royal Society of Chemistry journal article supplement (doi:10.1039/c8sm00476e), 1998-01-01
Supplement: c8sm00476e1.pdf [file c8sm00476e1.pdf]

# Supplementary information flow cell article

## S.I. 1: Photograph of the vapor deposition system

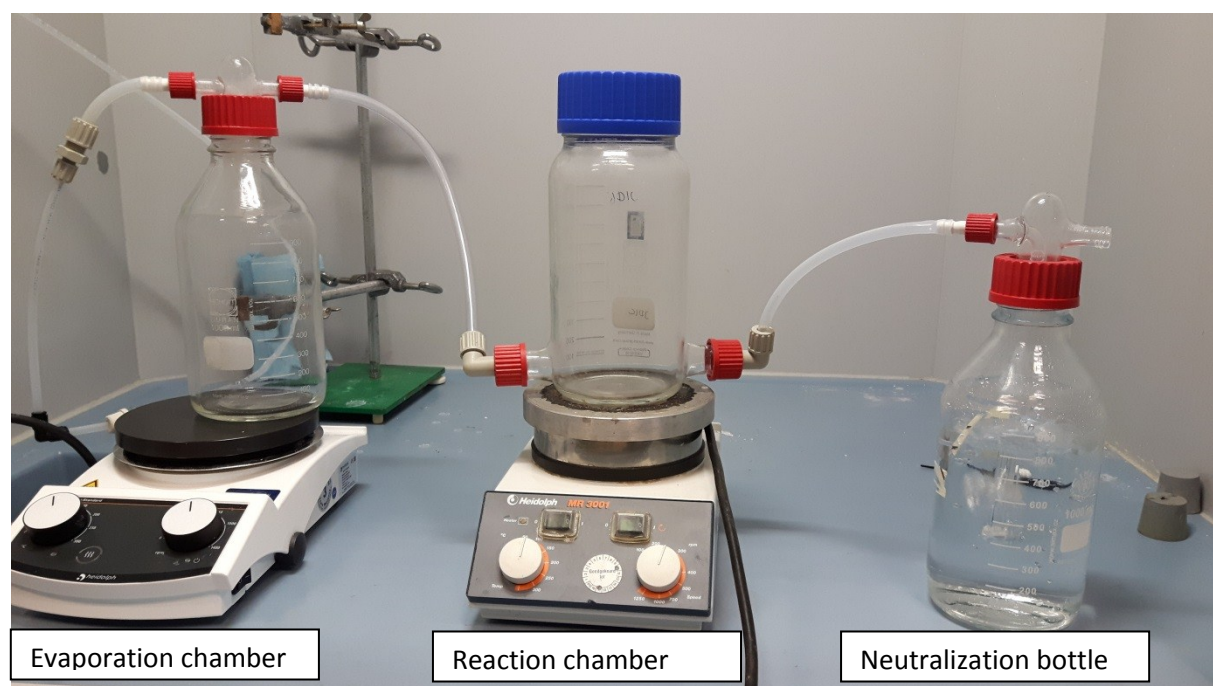

The injection gate of this setup was created by placing a piece of silicon tubing just before the inlet of the reaction chamber, as can be seen in the picture.

## S.I.2: Exact settings of flow cell and pump

The width of the flow cell channel is 15 mm.

| Action                       | Duration (min) | Channel width cell (mm) | Pump speed (l/h) |
|------------------------------|----------------|-------------------------|------------------|
| Inject emulsion and settling | 30             | 2.3                     | 0                |
| Flushing                     | 30             | 2.3                     | 1.5              |
| Shearing                     | 1              | 2.3                     | 6                |
| Shearing                     | 1              | 2.0                     | 6                |
| Shearing                     | 1              | 1.5                     | 6                |
| Shearing                     | 1              | 1.0                     | 6                |
| Shearing                     | 1              | 0.7                     | 16.2             |
| Shearing                     | 1              | 0.7                     | 25.3             |
| Shearing                     | 1              | 0.7                     | 34.5             |

### S.I.3: Contact angles after 30 minutes

|                            |             | contact angle<br>t=0 | stdev<br>t=0 | contact angle<br>t=30 | stdev<br>t=30 |
|----------------------------|-------------|----------------------|--------------|-----------------------|---------------|
| SDS 115 mg/L 10 mM NaCl    | hydrophilic | 164.45               | 1.9          | R                     | x             |
|                            | hydrophobic | 59                   | 1.4          | 57                    | 0.3           |
| SDS 231 mg/L 1 mM NaCl     | hydrophilic | 155.45               | 1.3          | R                     | x             |
|                            | hydrophobic | 58.95                | 1.6          | 53.2                  | 3.0           |
| SDS 231 mg/L 10 mM NaCl    | hydrophilic | 155.1                | 0.3          | R                     | x             |
|                            | hydrophobic | 67.1                 | 10.2         | 59.15                 | 5.9           |
| SDS 231 mg/L 100 mM NaCl   | hydrophilic | 153                  | 2.5          | R                     | x             |
|                            | hydrophobic | 151                  | 1.0          | 59.35                 | 5.7           |
| SDS 463 mg/L 10 mM NaCl    | hydrophilic | 150.35               | 0.9          | R                     | x             |
|                            | hydrophobic | 59.6                 | 7.8          | 53.3                  | 3.1           |
| CTAB 176 mg/L 10 mM NaCl   | hydrophilic | 140.5                | 3.5          | R                     | x             |
|                            | hydrophobic | 141.5                | 2.1          | R                     | x             |
| TX-100 149 mg/L 10 mM NaCl | hydrophilic | 150.15               | 0.2          | R                     | x             |
|                            | hydrophobic | 154.2                | 2.7          | 94.95                 | 10            |

### S.I. 4: Images of TX-100 in flow cell

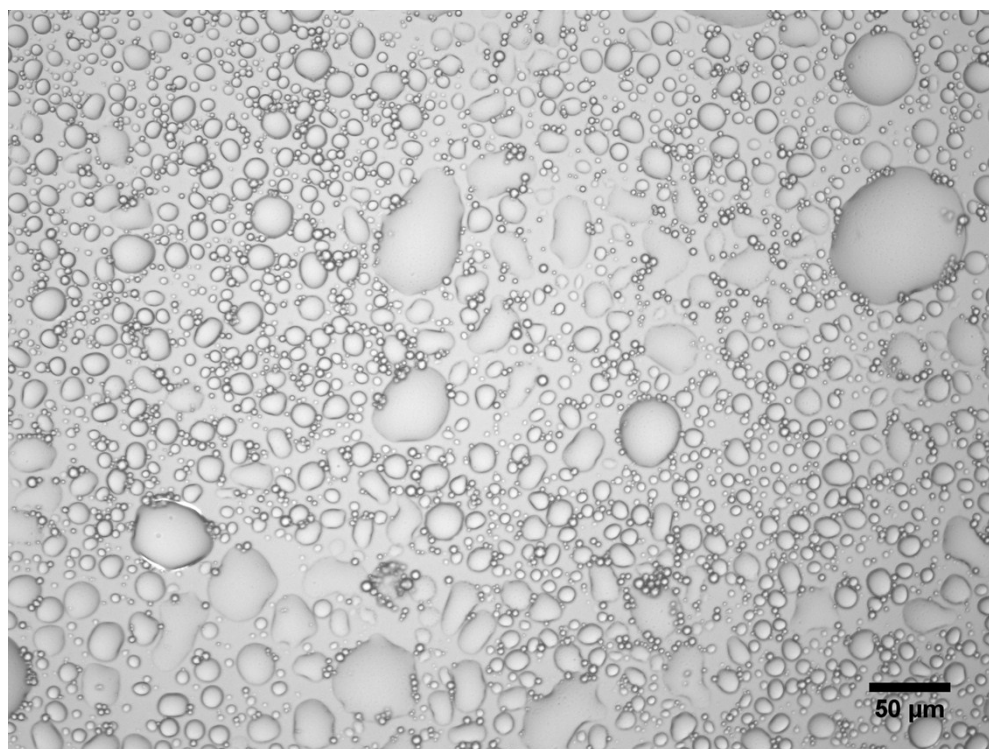

Image of oil droplets stabilized with TX-100 on a hydrophilic surface during flushing

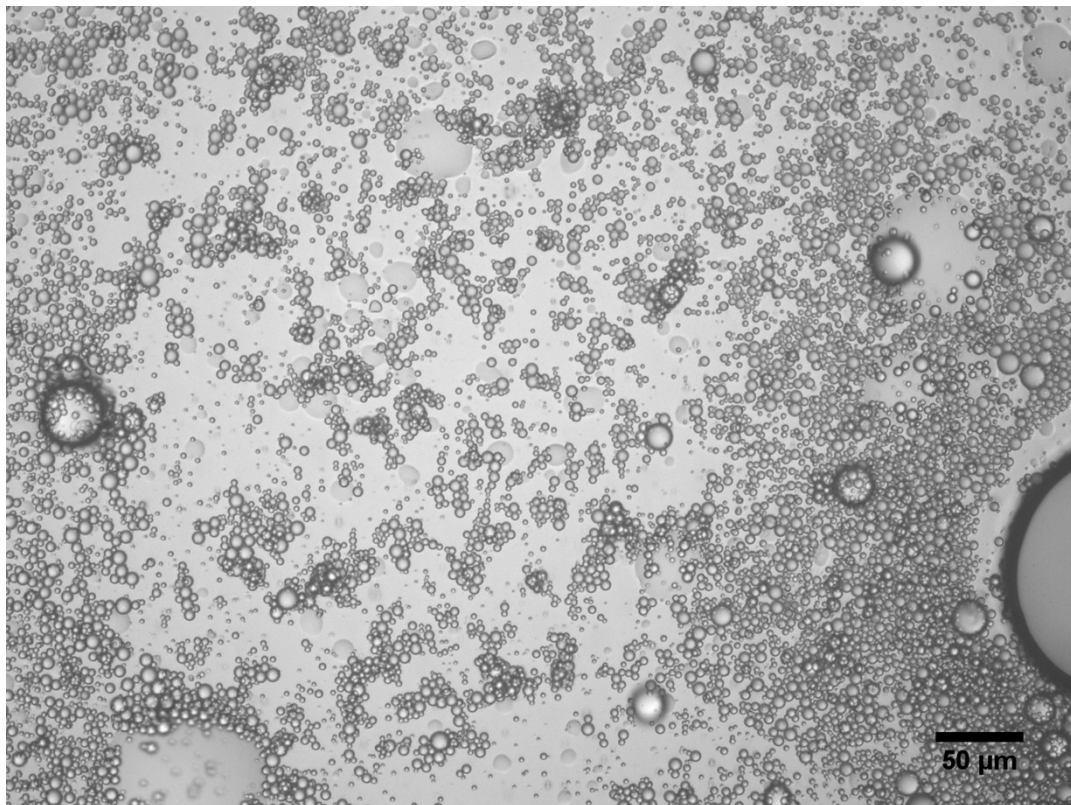

Image of oil droplets stabilized with TX-100 on a hydrophobic surface during flushing
